# Supplementary material
Source: publisher figshare collection journal article supplement (https://karger.figshare.com/articles/dataset/_/5123497)
Supplement: Supplementary file 1 [file 1]

**Table S1.** Physical and laboratory data of the 3 patients at admission (Laboratory values out of normal range in bold)

|                                          | <i>Patient I</i>      | <i>Patient II</i>     | <i>Patient III</i>    |
|------------------------------------------|-----------------------|-----------------------|-----------------------|
| <i>Physical findings at admission</i>    |                       |                       |                       |
| Age (years)                              | 72                    | 85                    | 61                    |
| Body surface affected (%)                | 20                    | 40                    | 30                    |
| Pulses/min                               | 74                    | 60                    | 108                   |
| Temperature (°C)                         | 38.0                  | 37.8                  | 37.5                  |
| Blood pressure systolic/diastolic (mmHg) | 135/80                | 105/60                | 140/75                |
| <i>Laboratory findings at admission</i>  |                       |                       |                       |
| Red blood cell count/l                   | 4.55x10 <sup>12</sup> | 4.65x10 <sup>12</sup> | 4.71x10 <sup>12</sup> |
| Hematocrit                               | <b>0.406</b>          | <b>0.405</b>          | <b>0.403</b>          |
| Hemoglobin (g/l)                         | <b>137.0</b>          | <b>127.0</b>          | <b>139.0</b>          |
| White blood cell count/l                 | 7.48x10 <sup>9</sup>  | 4.55x10 <sup>9</sup>  | 4.55x10 <sup>9</sup>  |
| Platelets/l                              | 145x10 <sup>9</sup>   | 182x10 <sup>9</sup>   | 247x10 <sup>9</sup>   |
| Erythrocyte sedimentation rate (mm/h)    | 17                    | 18                    | <b>32</b>             |
| C-reactive protein (mmol/l)              | 286                   | 476                   | 695                   |
| Glucose (mmol/l)                         | 5.72                  | <b>8.82</b>           | <b>15.54</b>          |
| Urea nitrogen (mmol/l)                   | <b>14.28</b>          | <b>47.48</b>          | <b>18.92</b>          |
| Creatinine (μmol/l)                      | 91.5                  | <b>152.5</b>          | <b>125.0</b>          |
| Sodium (mmol/l)                          | 138                   | 140                   | <b>130</b>            |
| Potassium (mmol/l)                       | 4.95                  | <b>2.95</b>           | 4.40                  |
| Bicarbonate (mmol/l)                     | 24.4                  | 30.6                  | 22.9                  |
| Bilirubin total (μmol/l)                 | 15.39                 | <b>47.9</b>           | 5.13                  |
| Bilirubin direct (μmol/l)                | 2.91                  | <b>18.47</b>          | 1.71                  |
| Alanine aminotransferase (μkat/l)        | 0.42                  | <b>1.09</b>           | 0.22                  |
| Aspartate aminotransferase (μkat/l)      | 0.45                  | <b>1.07</b>           | <b>1.58</b>           |
| Creatinine kinase (μkat/l)               | 1.19                  | <b>5.48</b>           | <b>3.79</b>           |
| Lactate dehydrogenase (μkat/l)           | <b>4.18</b>           | <b>7.45</b>           | <b>6.28</b>           |
| Amylase (μkat/l)                         | 1.94                  | <b>5.66</b>           | 0.42                  |
| Alkaline phosphatase (μkat/l)            | 0.77                  | 0.92                  | 1.14                  |
