# Supplementary material
Source: publisher figshare collection journal article supplement (https://karger.figshare.com/articles/dataset/_/5123497)
Supplement: Supplementary file 2 [file 1]

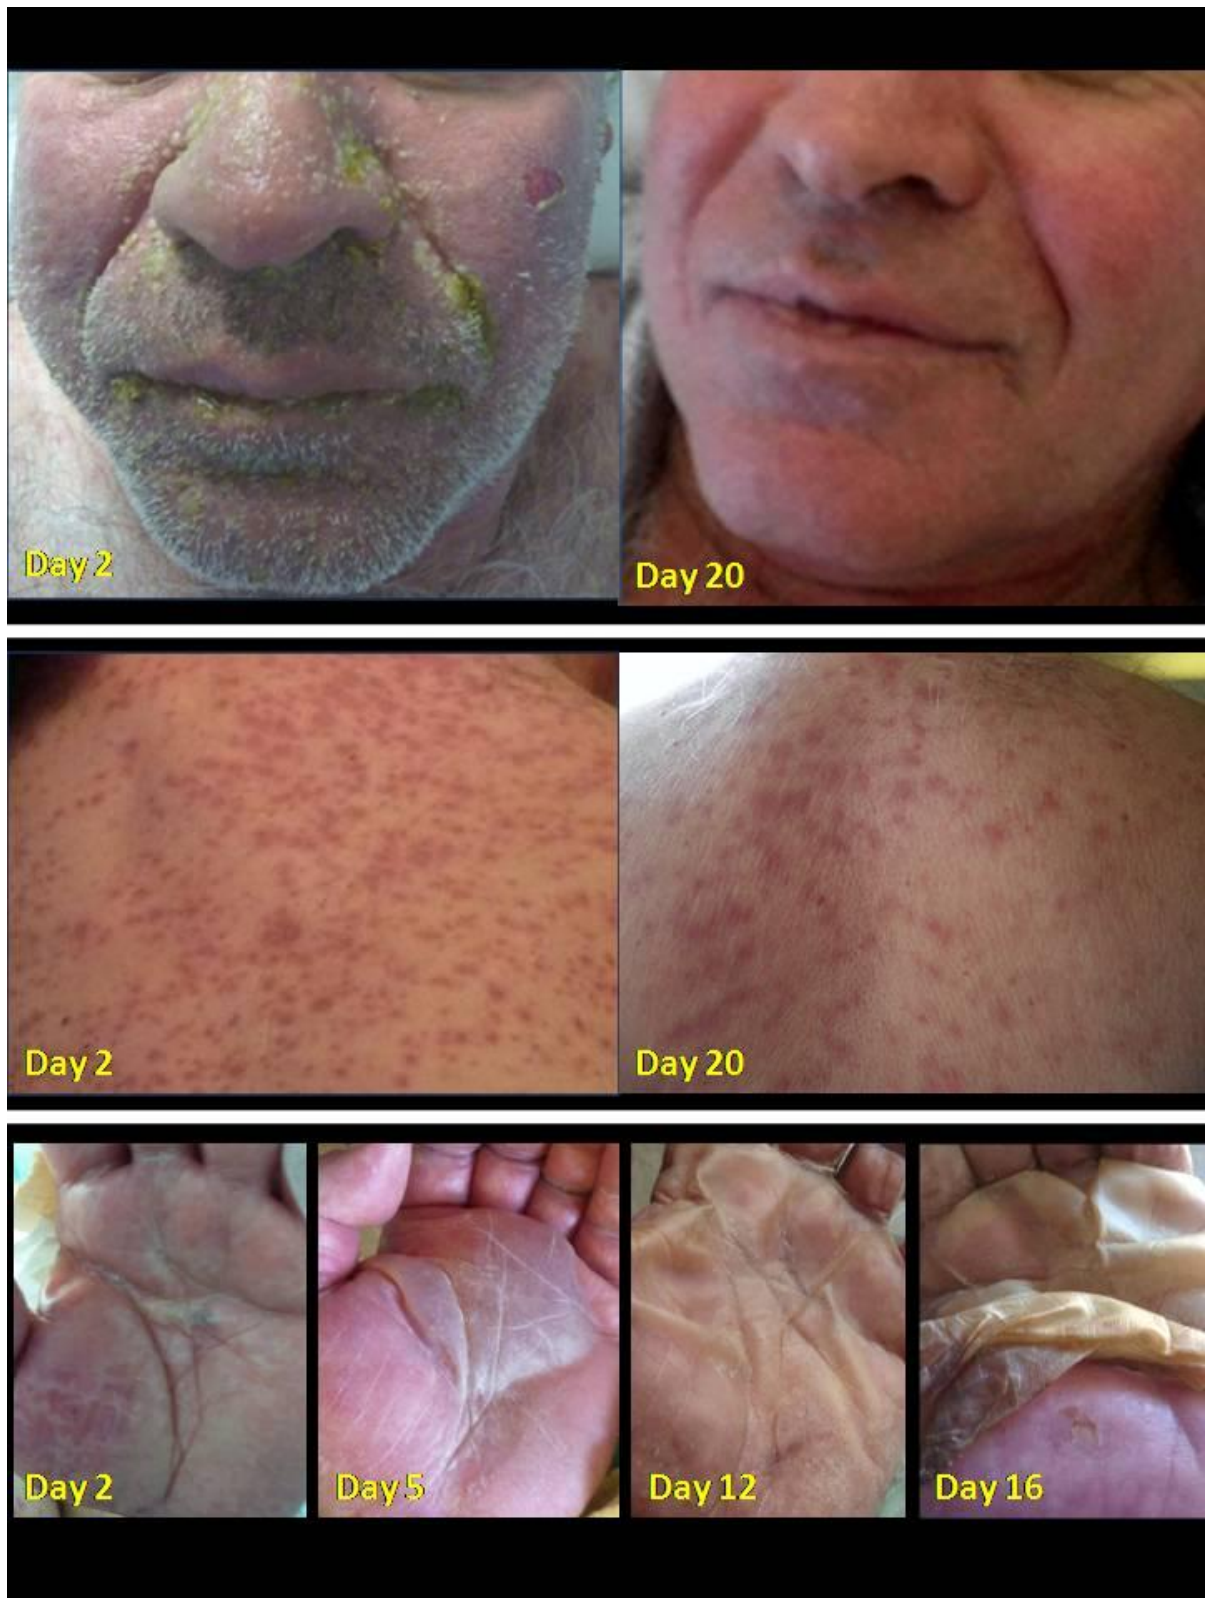

**Figure S2.** *Patient III:* Evolution of skin lesions (day numbers refer to days of hospitalization starting with day 1).

Upper panel: Detail of the face at days 2 and 20 of hospitalization.

Middle panel: Detail of the back of thorax at days 2 and 20 of hospitalization.

Lower panel: The evolution of the lesions at the right hand (palmar surface). Note the coherent (complete) detachment of the palmar epidermis followed by rapid rejuvenation already concluded at the beginning of the second week of hospitalization.
