# Supplementary material
Source: publisher figshare collection journal article supplement (https://karger.figshare.com/articles/dataset/_/5123497)
Supplement: Supplementary file 3 [file 1]

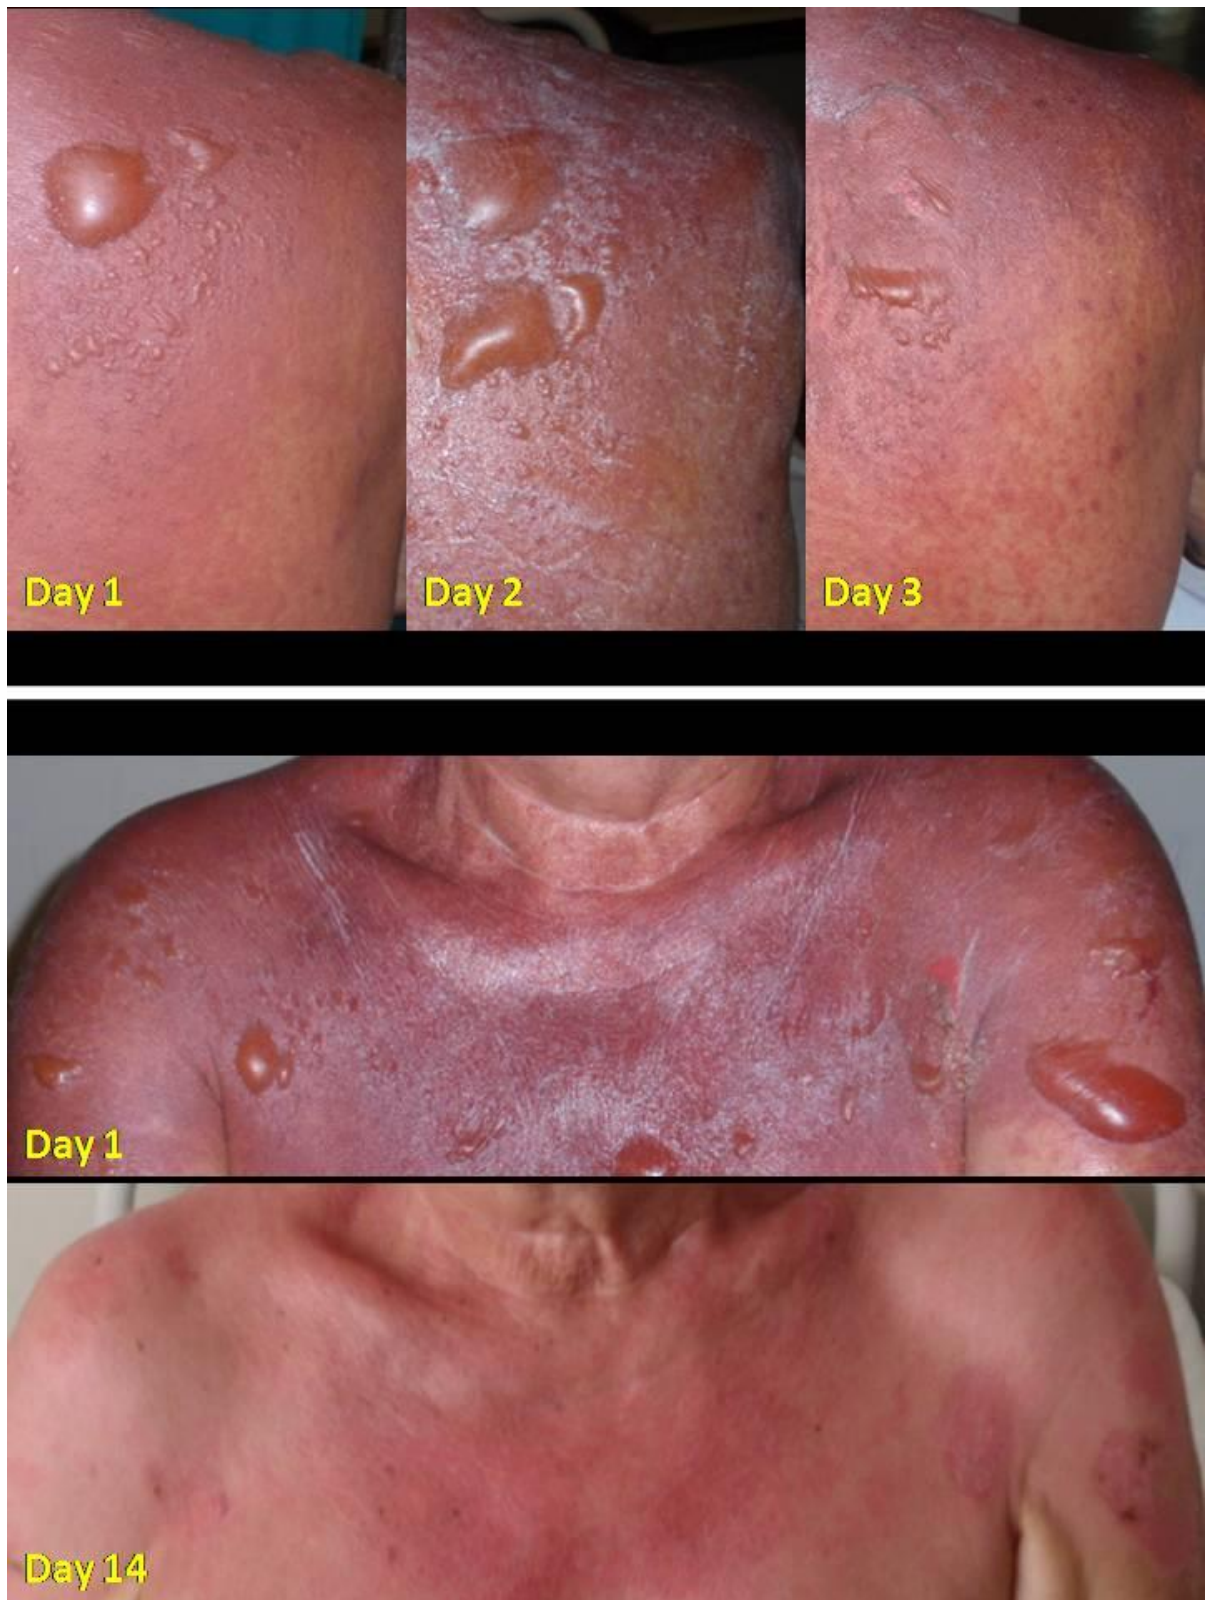

**Figure S1.** *Patient I:* Evolution of skin lesions (day numbers refer to days of hospitalization starting with day 1).

Upper panel: The development of the skin lesions during the first 3 days of hospitalization (right shoulder, detail). Note macroscopic disease control already at day 3 of hospitalization.

Lower panel: Confluent epidermis detachment on day 1 contrasting to rapid, almost complete skin reepithelization already at day 14 of hospitalization (upper thorax)
